# Supplementary material for: Laboratory Diagnostic of Acute Kidney Injury and Its Progression: Risk of Underdiagnosis in Female and Elderly Patients
Source: MDPI journal article supplement (doi:10.3390/jcm12031092), 2023-01-30
Supplement: s1 [file s1]

## Supplement

### Text S1. Recalculation of Creatinine

Estimated glomerular filtration rate (eGFR, ml/min/1.73m<sup>2</sup>) values at ULMC are calculated on the basis of the CKI-EPI equations [17] (using SCr in µmol/L) for a predominantly non-black cohort thus:

| Sex-specific knot mg/dL (µmol/L) | Equation                                                                         |
|----------------------------------|----------------------------------------------------------------------------------|
| Females ≤ 0.7 (62)               | $\text{eGFR} = 144 \times (\text{SCr}/0.7)^{-0.329} \times (0.993)^{\text{Age}}$ |
| Females > 0.7 (62)               | $\text{eGFR} = 144 \times (\text{SCr}/0.7)^{-1.209} \times (0.993)^{\text{Age}}$ |
| Males ≤ 0.9 (80)                 | $\text{eGFR} = 141 \times (\text{SCr}/0.9)^{-0.411} \times (0.993)^{\text{Age}}$ |
| Males > 0.9 (80)                 | $\text{eGFR} = 141 \times (\text{SCr}/0.9)^{-1.209} \times (0.993)^{\text{Age}}$ |

For the reverse action, the inference of serum creatinine (SCr) from eGFR, we rearranged the equations to the following while retaining the original grouping below and at/above the sex-specific knot, respectively. The factors 0.9 (instead of 0.7), 141 (instead of 144), and -0.411 (instead of -0.329) are needed to transform a “female” SCr into “male” SCr via the original eGFR. The recalculation of males into younger individuals was achieved by setting the variable Age to 30.

|                            |                                                                                                                            |
|----------------------------|----------------------------------------------------------------------------------------------------------------------------|
| Below/at sex-specific knot | $\text{SCr} = e^{\left( \ln \left( \text{eGFR}/141/0.993 \right)^{\text{Age}} / (-0.411) \right)} \times 0.9 \times 88.42$ |
| above sex-specific knot    | $\text{SCr} = e^{\left( \ln \left( \text{eGFR}/141/0.993 \right)^{\text{Age}} / (-1.209) \right)} \times 0.9 \times 88.42$ |

**Table S1. Comparison of progressive and non-progressive cases at first AKI detection during hospitalization in females and males. Variables are given as medians [interquartile range] or percentages. Significant *p*-Values (< 0.05) highlighted as bold.**

|                                                 | Female           |                     |                   | Male             |                     |                   |
|-------------------------------------------------|------------------|---------------------|-------------------|------------------|---------------------|-------------------|
|                                                 | Progressive AKI  | Non-progressive AKI | <i>p</i> -Value   | Progressive AKI  | Non-progressive AKI | <i>p</i> -Value   |
| Incidence proportion, n, %                      | 554, 22.0        | 2514, 78.0          |                   | 904, 25.0        | 3620, 75.0          |                   |
| <b>Basic patient characteristics</b>            |                  |                     |                   |                  |                     |                   |
| Age (years)                                     | 70.7 [59.0–79.5] | 72.4 [60.7–81.1]    | <b>0.013</b>      | 66.0 [57.0–75.9] | 68.0 [58.2–78.1]    | <b>0.003</b>      |
| Total length of hospitalization (days)          | 24.7 [14.2–43.1] | 15.1 [8.3–27.1]     | <b>&lt; 0.001</b> | 26.3 [14.9–42.6] | 16.0 [8.2–28.3]     | <b>&lt; 0.001</b> |
| First eGFR                                      | 58.0 [36.1–85.1] | 60.2 [36.0–85.5]    | 0.696             | 61.9 [37.7–88.1] | 63.7 [39.7–88.2]    | 0.371             |
| Last eGFR                                       | 44.9 [25.2–74.4] | 54.9 [34.4–83.6]    | <b>&lt; 0.001</b> | 58.1 [38.1–85.7] | 46.0 [25.7–75.7]    | <b>&lt; 0.001</b> |
| Time to first AKI during hospitalization (days) | 4.9 [1.9–11.9]   | 4.6 [1.9–10.6]      | 0.242             | 4.5 [1.8–9.4]    | 4.5 [1.9–10.0]      | 0.336             |
| In-hospital mortality                           | 45.5             | 16.8                | <b>&lt; 0.001</b> | 45.0             | 17.5                | <b>&lt; 0.001</b> |
| <b>Comorbidities</b>                            |                  |                     |                   |                  |                     |                   |
| I10.- Hypertension                              | 47.7             | 48.3                | 0.823             | 46.9             | 46.2                | 0.750             |
| E11.- Diabetes mellitus                         | 31.4             | 31.9                | 0.847             | 35.2             | 34.2                | 0.607             |
| E86.- Exsiccosis                                | 6.0              | 4.5                 | 0.176             | 3.4              | 4.6                 | 0.143             |
| R57.- Shock                                     | 37.9             | 12.6                | <b>&lt; 0.001</b> | 44.3             | 16.8                | <b>&lt; 0.001</b> |
| I25.- Coronary heart disease                    | 11.2             | 14.0                | 0.097             | 23.5             | 23.3                | 0.980             |
| I21.- Myocardial infarction                     | 3.4              | 3.2                 | 0.869             | 6.2              | 4.5                 | <b>0.046</b>      |
| I50.- Cardiac insufficiency                     | 33.9             | 27.8                | <b>0.004</b>      | 34.6             | 26.4                | <b>&lt; 0.001</b> |
| A41.- Sepsis                                    | 38.8             | 15.6                | <b>&lt; 0.001</b> | 41.9             | 20.7                | <b>&lt; 0.001</b> |
| K74.- Liver cirrhosis                           | 8.7              | 4.3                 | <b>&lt; 0.001</b> | 9.0              | 4.1                 | <b>&lt; 0.001</b> |

**Table S2. Comparison of age groups with regard to AKI stages and sex. Based on common AKI cases for females and females as male.**

| Age group |                | First AKI stage during hospitalization, %, (n) |            |                  | Maximum AKI stage during hospitalization, %, (n) |            |                   |
|-----------|----------------|------------------------------------------------|------------|------------------|--------------------------------------------------|------------|-------------------|
|           |                | AKIN1                                          | AKIN2      | AKIN3            | AKIN1                                            | AKIN2      | AKIN3             |
| [18–41)   | Female         | 78.2 (140)                                     | 15.1 (27)  | <b>6.7 (12)</b>  | 62.6 (112)                                       | 20.1 (36)  | <b>17.3 (31)</b>  |
|           | Female as male | 74.3 (133)                                     | 14.0 (25)  | <b>11.7 (21)</b> | 59.8 (107)                                       | 13.4 (24)  | <b>26.8 (48)</b>  |
| [41–61)   | Female         | 81.3 (443)                                     | 12.1 (66)  | <b>6.6 (36)</b>  | 61.3 (334)                                       | 22.6 (123) | <b>16.1 (88)</b>  |
|           | Female as male | 83.1 (453)                                     | 10.8 (59)  | <b>6.1 (33)</b>  | 62.2 (339)                                       | 20.7 (113) | <b>17.1 (93)</b>  |
| [61–81)   | Female         | 82.8 (1207)                                    | 11.5 (167) | <b>5.7 (83)</b>  | 65.5 (955)                                       | 20.9 (305) | <b>13.5 (197)</b> |
|           | Female as male | 83.1 (1211)                                    | 10.3 (150) | <b>6.7 (97)</b>  | 65.4 (953)                                       | 18.1 (264) | <b>16.5 (241)</b> |
| [81–max]  | Female         | 86.2 (631)                                     | 10.5 (77)  | <b>3.3 (24)</b>  | 71.7 (525)                                       | 20.1 (147) | <b>8.2 (60)</b>   |
|           | Female as male | 85.1 (622)                                     | 9.4 (69)   | <b>5.5 (40)</b>  | 69.4 (507)                                       | 17.1 (125) | <b>13.5 (99)</b>  |

**Table S3. Comparison of age groups regarding AKI stages and sex. Based on common AKI cases for males and males as young.**

| Age group |               | First AKI stage during hospitalization, %, (n) |            |                   | Maximum AKI stage during hospitalization, %, (n) |            |                   |
|-----------|---------------|------------------------------------------------|------------|-------------------|--------------------------------------------------|------------|-------------------|
|           |               | AKIN1                                          | AKIN2      | AKIN3             | AKIN1                                            | AKIN2      | AKIN3             |
| [18–41)   | Male          | 74.2 (187)                                     | 17.9 (45)  | <b>7.9 (20)</b>   | 57.5 (145)                                       | 23.8 (60)  | <b>18.7 (47)</b>  |
|           | Male as young | 76.6 (193)                                     | 15.1 (38)  | <b>8.3 (21)</b>   | 59.5 (150)                                       | 20.2 (51)  | <b>20.2 (51)</b>  |
| [41–61)   | Male          | 79.2 (795)                                     | 12.6 (127) | <b>8.2 (82)</b>   | 56.1 (563)                                       | 21.9 (220) | <b>22.0 (221)</b> |
|           | Male as young | 83.7 (840)                                     | 8.5 (59)   | <b>7.9 (79)</b>   | 62.1 (623)                                       | 17.1 (172) | <b>20.8 (209)</b> |
| [61–81)   | Male          | 82.7 (1827)                                    | 10.5 (232) | <b>6.8 (150)</b>  | 64.1 (1417)                                      | 18.4 (407) | <b>17.4 (385)</b> |
|           | Male as young | 83.7 (1848)                                    | 5.6 (123)  | <b>10.8 (238)</b> | 66.8 (1476)                                      | 10.7 (236) | <b>22.5 (497)</b> |
| [81–max]  | Male          | 87.0 (578)                                     | 7.5 (50)   | <b>5.4 (36)</b>   | 70.0 (465)                                       | 15.5 (103) | <b>14.5 (96)</b>  |
|           | Male as young | 82.1 (545)                                     | 2.7 (18)   | <b>15.2 (101)</b> | 64.5 (428)                                       | 7.8 (52)   | <b>27.7 (184)</b> |
